# Supplementary material for: How the Italian NHS Is Fighting Against the COVID-19 Emergency
Source: Front Public Health. 2020 May 8;8:167. doi: 10.3389/fpubh.2020.00167 (PMC7227414; doi:10.3389/fpubh.2020.00167)
Supplement: Supplementary file 1 [file Table_1.xlsx]

## Sheet: Sheet1
Cases of COVID-19 reported from Italian regions as of 22nd April 2020
		Cases/million	Cases	Population
	Abruzzo	2083.75	2733	1311580
	Valle d'Aosta	8713.57	1095	125666
	Apulia	773.879	3118	4029053
	Basilicata	628.921	354	562869
	Calabria	544.391	1060	1947131
	Campania	721.341	4185	5801692
	Emilia-Romagna	5254.88	23434	4459477
	Fruli-Venezia-Giulia	2318.1	2817	1215220
	Lazio	1016.32	5975	5879082
	Liguria	4461.38	6918	1550640
	Lombardy	6867.6	69092	10060574
	Marche	3883.9	5924	1525271
	Molise	929.268	284	305617
	Trentino	5636.39	6052	1073736
	Piedmont	5219.67	22739	4356406
	Sardinia	760.556	1247	1639591
	Sicily	576.613	2883	4999891
	Tuscany	2332.66	8700	3729641
	Umbria	1538.52	1357	882015
	Veneto	3411.84	16738	4905854
Source of data: http://opendatadpc.maps.arcgis.com/apps/opsdashboard/index.html#/b0c68bce2cce478eaac82fe38d4138b1
